# Supplementary material for: Effects of Creatine Supplementation on Lower-Limb Muscle Endurance Following an Acute Bout of Aerobic Exercise in Young Men
Source: PubMed Central journal article supplement (PMC7077271; doi:10.3390/sports8020012), 2020-01-21
Supplement: sports-08-00012-s001.pdf [file sports-08-00012-s001.pdf]

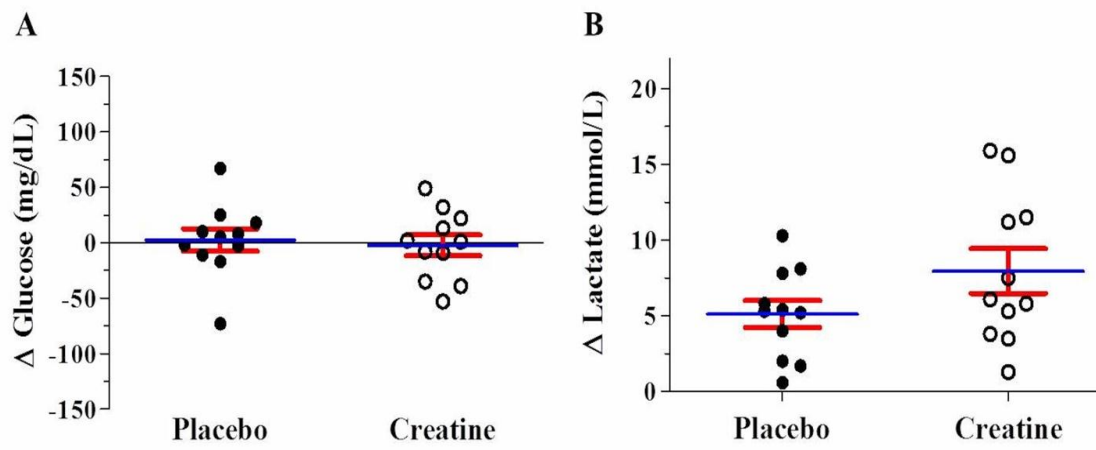

**Figure S1.** Delta blood glucose (A) and lactate (B) concentrations for participants either on placebo or on creatine supplementation. No significant differences observed between groups.
